# Supplementary material
Source: HighWire-hosted journal article supplement (https://jnis.bmj.com/content/12/5/483)
Supplement: inline-supplementary-material-1 [file inline-supplementary-material-1.pdf]

Subject Initials:

Subject Number:

| eICF Survey                                                                                                                                                                                                                                                                                                                                                                                                                            |
|----------------------------------------------------------------------------------------------------------------------------------------------------------------------------------------------------------------------------------------------------------------------------------------------------------------------------------------------------------------------------------------------------------------------------------------|
| eICF Record ID (from RedCap):                                                                                                                                                                                                                                                                                                                                                                                                          |
| Patient's Name:                                                                                                                                                                                                                                                                                                                                                                                                                        |
| LAR's Name:                                                                                                                                                                                                                                                                                                                                                                                                                            |
| LAR's Age?                                                                                                                                                                                                                                                                                                                                                                                                                             |
| What is your sex?<br><input type="checkbox"/> Female<br><input type="checkbox"/> Male                                                                                                                                                                                                                                                                                                                                                  |
| Which of the following best describes you?<br><input type="checkbox"/> American Indian/Alaska Native<br><input type="checkbox"/> Asian<br><input type="checkbox"/> Black or African American<br><input type="checkbox"/> Hawaiian or Pacific Islander<br><input type="checkbox"/> White<br><input type="checkbox"/> Hispanic or Latino<br><input type="checkbox"/> Multi-race<br><input type="checkbox"/> Other:                       |
| What is the last grade you completed in school?<br><input type="checkbox"/> Less than high school<br><input type="checkbox"/> Some high school<br><input type="checkbox"/> High school or GED<br><input type="checkbox"/> Some college<br><input type="checkbox"/> College graduate<br><input type="checkbox"/> Some post-graduate<br><input type="checkbox"/> Post-graduate or Professional degree<br><input type="checkbox"/> Other: |
| Do you think the electronic consent form sent to your smartphone described the study in a clear manner?<br><input type="checkbox"/> Yes<br><input type="checkbox"/> No                                                                                                                                                                                                                                                                 |
| How comfortable were you in reading and signing the electronic consent?<br><input type="checkbox"/> Very<br><input type="checkbox"/> Somewhat<br><input type="checkbox"/> Not at all – why?                                                                                                                                                                                                                                            |
| If you had to go over this again, would you prefer to receive a paper version of the consent form?<br><input type="checkbox"/> Yes<br><input type="checkbox"/> No                                                                                                                                                                                                                                                                      |
| How would you rate your electronic consent experience?<br><input type="checkbox"/> Excellent<br><input type="checkbox"/> Good<br><input type="checkbox"/> Neutral<br><input type="checkbox"/> Poor                                                                                                                                                                                                                                     |
